# Supplementary material for: The level of synovial human VEGFA, IL-8 and MIP-1α correlate with truncation of lubricin glycans in osteoarthritis
Source: bioRxiv or medRxiv preprint supplement (doi:10.1101/2021.03.11.434779), 2021-03-30

## Supplementary Figure 1. Cytokines display

### different correlation pattern comparing synovial fluid and plasma. Co-regulation

between cytokines concentrations within control plasma (n=16) (A) and plasma, OA plasma (n=29) (B) and OA synovial fluid (n=52) (C). Detectable expressed (above LLOQ) 27 cytokines were correlated within each sample group, and Spearman's rank correlations coefficient  $r$  were calculated and indicated in color scale. Positive correlations were in red and negative correlations were in blue as shown in indicator legend. Correlations were calculated by two-tailed Spearman correlation: 1 indicates a perfect positive linear relationship, -1 indicates a perfect negative linear relationship, and 0 stands for no linear relationship. D) Differences in correlation between cytokines were calculated using Spearman's rank correlations coefficients  $r$  of the cytokines in each sample were calculated. Significances of differences in Spearman's rank between samples were calculated using Mann Whitney U-tests, \* indicate  $p < 0.05$ .

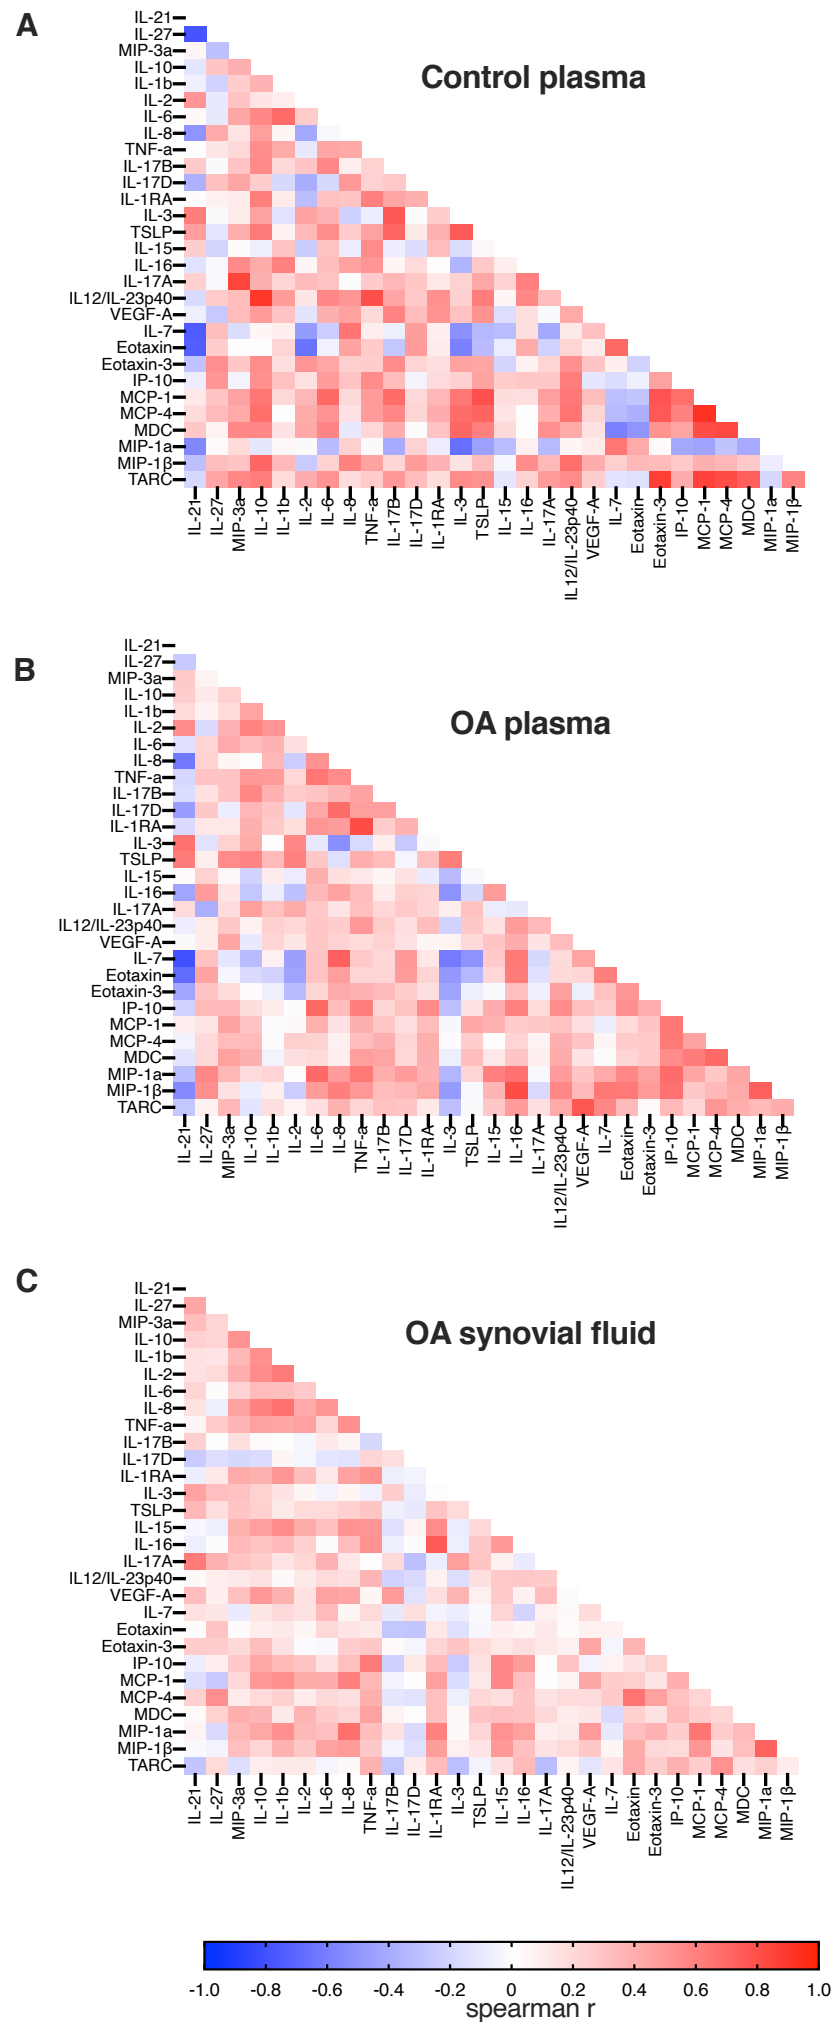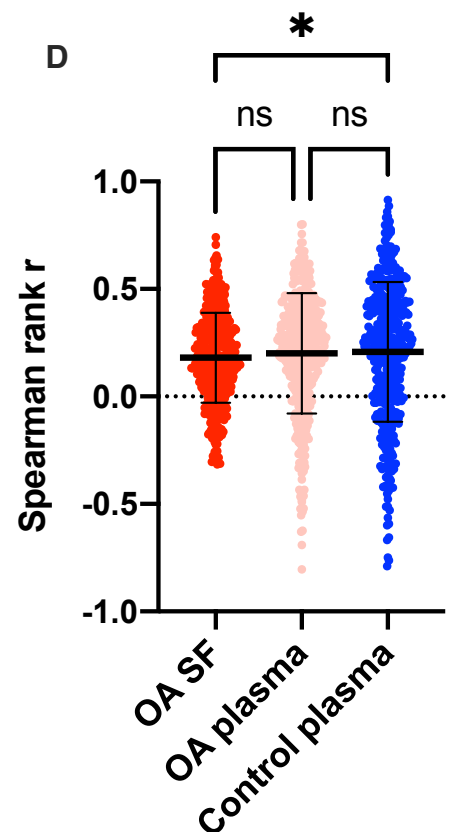

Supplement: Supplementary file [file media-1.pdf]
