# Supplementary material for: The level of synovial human VEGFA, IL-8 and MIP-1α correlate with truncation of lubricin glycans in osteoarthritis
Source: bioRxiv or medRxiv preprint supplement (doi:10.1101/2021.03.11.434779), 2021-03-30
Supplement: Supplementary file [file media-2.pdf]

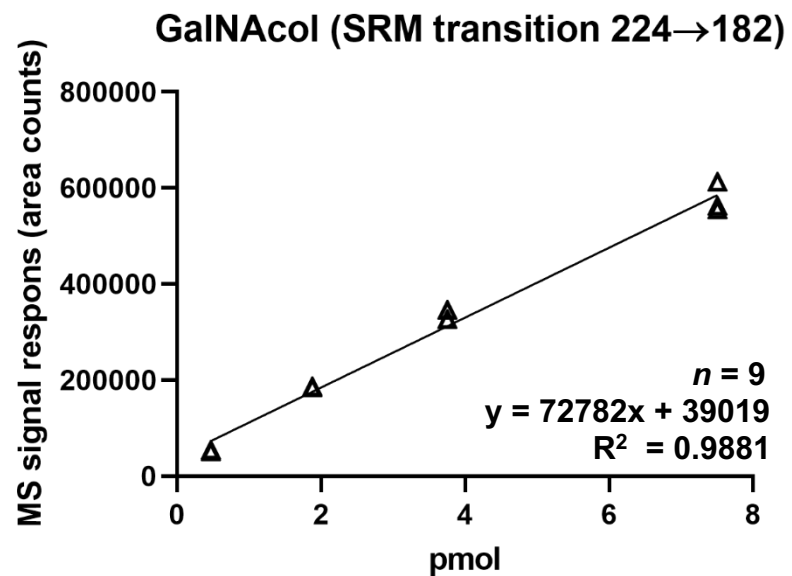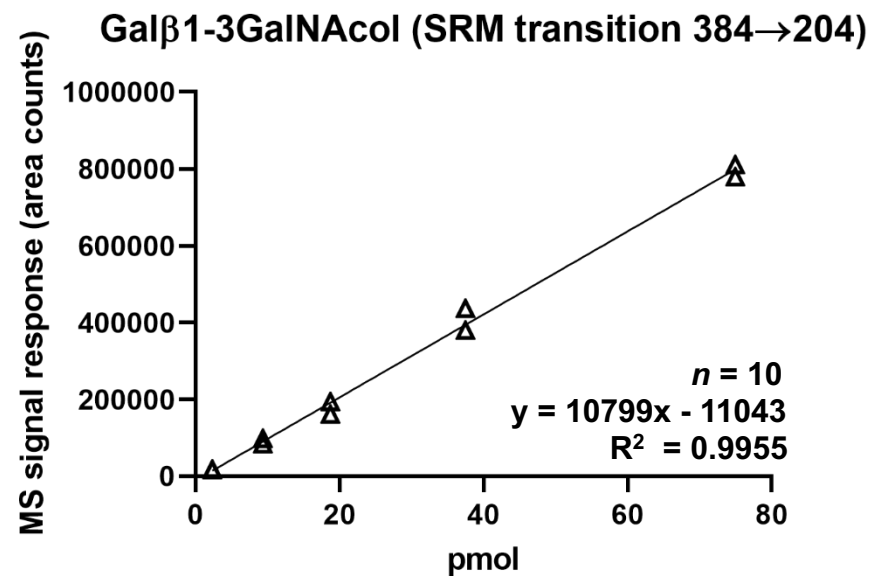

**Supplementary Figure 2.** O-glycans 'GalNAc' and 'Gal $\beta$ 1-3GalNAc' were reduced and analyzed as alditols at different concentrations as described in Materials and Methods
